# Supplementary material
Source: publisher figshare collection journal article supplement (https://acs.figshare.com/ndownloader/files/4366306)
Supplement: Supplementary file 1 [file 4366306]

# Controlled Modulation of Electronic Properties of Graphene by Self-Assembled Monolayers on SiO<sub>2</sub> Substrates-Supporting Information

Zheng Yan, Zhengzong Sun, Wei Lu, Jun Yao, Yu Zhu and James M. Tour\*

*Richard E. Smalley Institute for Nanoscale Science and Technology, Department of Chemistry,  
Applied Physics Program through the Department of Bioengineering and Department of  
Mechanical Engineering and Materials Science, Rice University, 6100 Main Street, Houston,  
Texas, 77005*

\*E-mail: [tour@rice.edu](mailto:tour@rice.edu)

## Table of Contents

Methods, page S1

Figure S1, Structures of Molecules and Formation of SAMs, page [S5](#)

Figure S2, XPS Survey Spectra, page S6

Figure S3, I/V Curves, Page S6

References, Page S6

## Methods

**Single-layer graphene growth.** Graphene was grown on a 25- $\mu$ m-thick Cu foil (Alfa Aesar, item No. 13382, cut to 1 cm  $\times$  1 cm squares). PMMA/Cu film was obtained by spin-coating 200  $\mu$ L PMMA (MicroChem Corp. 950 PMMA A4, 4% in anisole) solution on the surface of copper foil at 3000 rpm for 40 s. The obtained sample was dried at 180  $^{\circ}$ C for 1 min to remove the solvent. A typical growth process was: (1) load the quartz-tube with the PMMA coated Cu foil; (2) evacuate to 100 mTorr and increase the temperature to 1000  $^{\circ}$ C; (3) introduce the PMMA/Cu sample into the furnace and anneal it under the H<sub>2</sub> (50 sccm) and Ar (500 sccm) flow for 10-20 min; (4) the Cu foil with the graphene was cooled to room temperature under a H<sub>2</sub>/Ar atmosphere.

**SiO<sub>2</sub> substrate cleaning.** Prior to the transferring of graphene, the SiO<sub>2</sub> surface underwent a hydrophilic treatment by oxygen-plasma etching for 10 min followed by immersion in piranha solution (3:1 sulfuric acid to hydrogen peroxide) for 30 min. SiO<sub>2</sub> surfaces were thoroughly cleaned with DI water and were dried by nitrogen flow.

**H<sub>2</sub>N-SAMs.** The process was as follows: (1) the cleaned silicon wafers were placed in sealed vials, which were backfilled with nitrogen through a septum; (2) the 3-aminopropyltriethoxysilane (1 mL) was added to the sealed vials followed by the addition of anhydrous toluene (2 mL) to form a 33% solution of 3-aminopropyltriethoxysilane in toluene by volume; (3) the silicon wafers were kept in the vials for 1 h at 75 °C; (3) the silicon wafers functionalized with the H<sub>2</sub>N-SAMs were washed with toluene, followed by methanol and DI water; (4) the functionalized silicon wafers were immersed in DI water for 24 h at room temperature to complete the hydrolysis of residual ethoxy groups; (5) the functionalized silicon wafers were placed in aqueous NaOH (~0.01 mM) at pH 9 for 30 s to remove any adsorbed CO<sub>2</sub>; (6) the functionalized wafers were further cleaned by rinsing with DI water; and (7) the functionalized wafers were dried with nitrogen.

**H<sub>3</sub>N<sup>+</sup>-SAMs.** The protonated SAMs were prepared by submersion of the H<sub>2</sub>N-SAMs in 1 M H<sub>2</sub>SO<sub>4</sub> solution for 24 h followed by rinsing with DI water.

**F-SAMs and CH<sub>3</sub>-SAMs.** The process for functionalizing the silicon wafers with F- or CH<sub>3</sub>-SAMs was similar, as follows: (1) the cleaned wafers were placed in a 65 cm<sup>3</sup> vessel with a glass container filled with ca. 0.2 cm<sup>3</sup> of 1*H*,1*H*,2*H*,2*H*-perfluorooctyltriethoxysilane or butyltriethoxysilane; (2) the vessel was sealed with a cap and heated in an oven at 120 °C for 2 h; (3) after cooling to room temperature, the functionalized wafers were removed from

the deposition chamber and were washed with toluene, followed by methanol and DI water; and (4) the functionalized wafers were dried with nitrogen.<sup>1</sup>

**Graphene transfer.** The transfer process was: (1) spin-coating a PMMA film (200  $\mu$ L, 3000 rpm for 1 min) onto the graphene/Cu film; (2) etching the Cu foil with Marble's reagent ( $\text{CuSO}_4 : \text{HCl} : \text{H}_2\text{O} :: 10 \text{ g} : 50 \text{ mL} : 50 \text{ mL}$ ) for 2 h; (3) transferring the PMMA-graphene into deionized (DI) water for 20 min (3 times) to remove the etchant ions; (4) dipping a  $\text{SiO}_2/\text{Si}$  substrate into the deionized water and picking up the film; (5) drying the film in vacuum ( $\sim 100$  Torr) at 70  $^\circ\text{C}$  for 2 h to remove the water; (6) dipping the film into acetone solvent to remove the PMMA; (7) drying the graphene film in vacuum ( $\sim 100$  Torr) at 70  $^\circ\text{C}$  for 30 min.

**Fabrication procedure for graphene FETs.** The obtained single-layer graphene was transferred onto a highly doped  $\text{Si}^{++}$  substrate with 100 nm thermal oxide. Electron beam lithography was used to define a PMMA mask on the top of the graphene. Reactive ion etching with  $\text{O}_2/\text{Ar}$  flow was used to remove the exposed graphene (flow rate ratio of 1:2 and a total flow rate of 35 sccm). The PMMA mask was removed with acetone. In the end, Pt electrodes were defined by e-beam lithography and 30 nm Pt was deposited using CRC-150 Sputter Coater.

**SAM characterizations.** For the macroscopic characterization, the water contact angle was measured by placing deionized water droplets (5-10  $\mu$ L) on the SAMs surface with a micropipette. Five measurements on each treated substrate were recorded using a ramé-hart goniometer and the measured values for the same sample were within 3 $^\circ$ , indicating macroscopically uniform surface coverage. The average values of five measurements were

calculated and the results are summarized in Table 1. The water contact angles for F-, CH<sub>3</sub>- and H<sub>2</sub>N-SAMs agree well with the reported values,<sup>2-5</sup> providing confirmation for the successful formation of SAMs.

For microscopic characterization, the thickness of the SAMs was measured using an LSE Stokes Ellipsometer. Measurements were performed on ten different spots on each specimen. Prior to the SAM coatings, the thickness of the native oxide of each sample of the Si substrate was measured using the refractive index of Si (3.875) and SiO<sub>2</sub> (1.465). Assuming that SAMs and the native oxide were transparent at this wavelength and have the same refractive index of 1.465,<sup>3-5</sup> the actual thickness of SAMs was calculated by subtracting the thickness of the native oxide layer from the total thickness of SAMs and the native oxide.

The elemental compositions of SAMs and the untreated substrate were investigated by XPS. The XPS survey spectra of the untreated substrate only shows signals for Si and O, which are attributed to the native oxide layer on the top surface of Si (Fig. S3a). After treatment with silane compounds, the F, C, N or N<sup>+</sup> clearly appeared on the XPS survey spectra of F-, CH<sub>3</sub>-, H<sub>2</sub>N- and H<sub>3</sub>N<sup>+</sup>-SAMs, respectively, Fig. S3b, c, d and e, indicating the successful formation of SAMs.

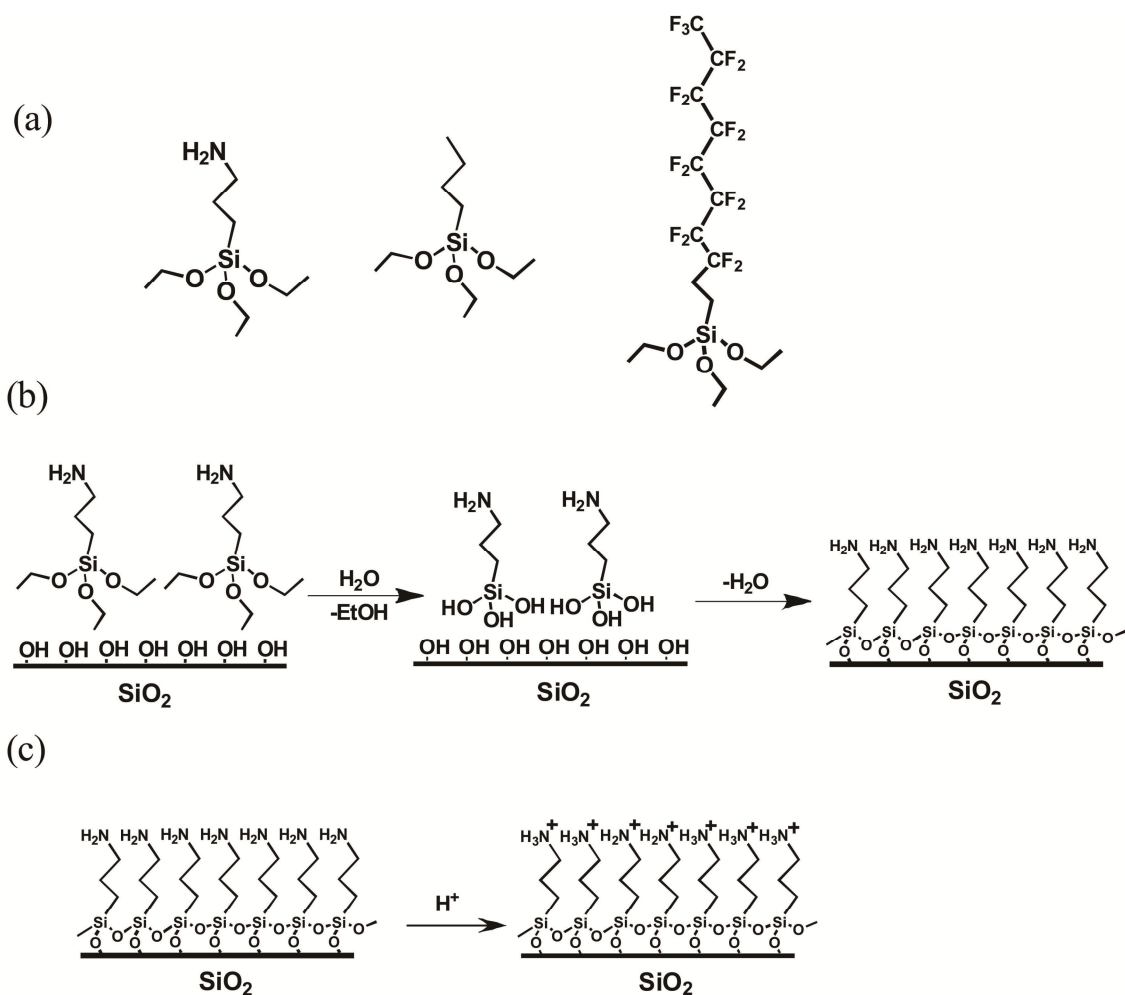

**Figure S1.** (a) The 3-aminopropyltriethoxysilane, butyltriethoxysilane, and 1*H*,1*H*,2*H*,2*H*-perfluorooctyltriethoxysilane molecules. (b) The schematic for the formation of H<sub>2</sub>N-SAMs. The formation mechanism for F- and CH<sub>3</sub>-SAMs is similar with that of H<sub>2</sub>N-SAMs. (c) The schematic for the formation of H<sub>3</sub>N<sup>+</sup>-SAMs.

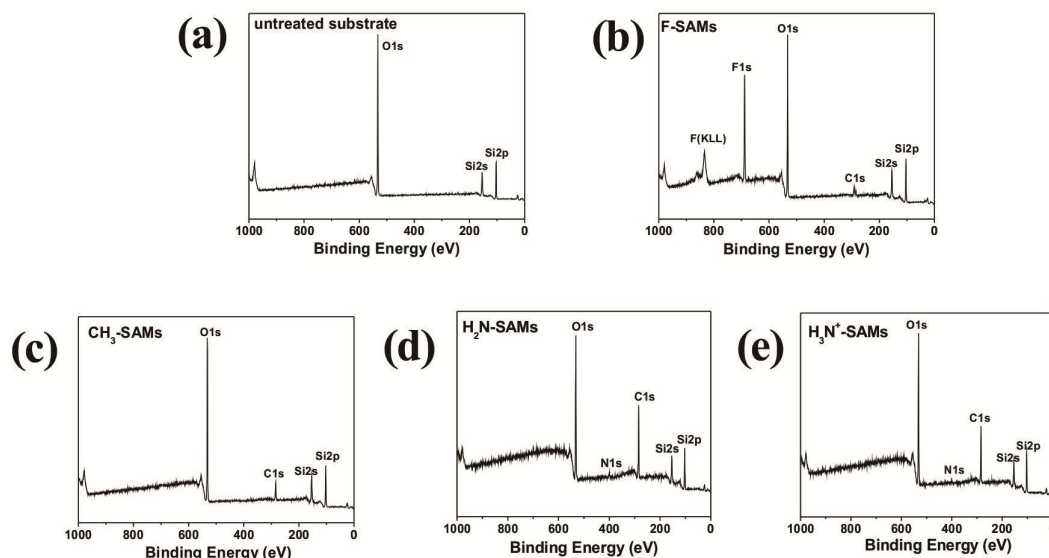

**Figure S2.** The XPS survey spectra for (a) the untreated substrate; (b) F-SAMs; (c) CH<sub>3</sub>-SAMs; (d) H<sub>2</sub>N-SAMs; and (e) H<sub>3</sub>N<sup>+</sup>-SAMs.

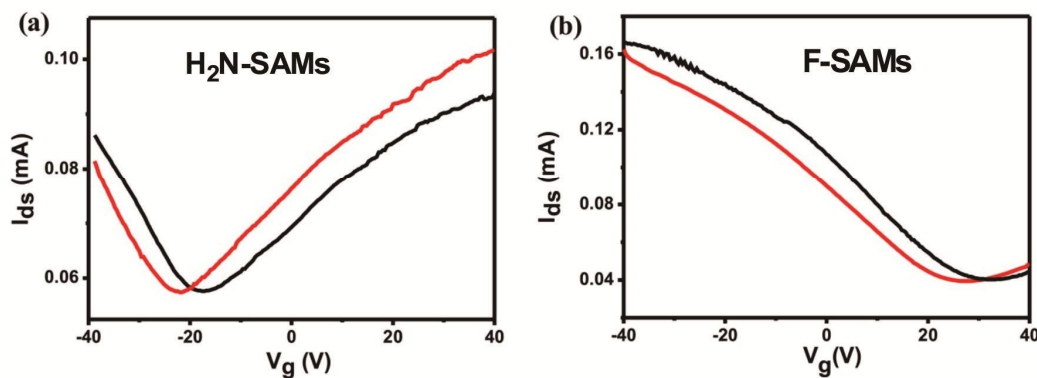

**Figure S3.** Ids-V<sub>g</sub> curves of the devices fabricated on H<sub>2</sub>N-SAMs (a) and F-SAMs (b) after kept under vacuum ( $10^{-6}$  Torr) for 3 d (black lines) and 7 d (red lines) at V<sub>ds</sub> = 0.1 V.

## References

- (1) Kobayashi, S.; Nishikawa, T.; Takenobu, T.; Mori, S.; Shimoda, T.; Mitani, T.; Shimotani, H.; Yoshimoto, N.; Ogawa, S.; Iwasa, Y. Control of Carrier Density by Self-Assembled Monolayers in Organic Field-Effect Transistors. *Nat. Mater.* **2004**, *3*,

317-322.

- (2) Ito, Y.; Virkar, A.; Mannsfeld, S.; Oh, J.; Toney, M.; Locklin, J.; Bao Z. Crystalline Ultrasmooth Self-Assembled Monolayers of Alkylsilanes for Organic-Field-Effect Transistors. *J. Am. Chem. Soc.* **2009**, *131*, 9396-9404.
- (3) Hozumi, A.; Ushiyama, K.; Sugimura, H.; Takai, O. Fluoroalkylsilane Monolayers Formed by Chemical Vapor Surface Modification on Hydroxylated Oxide Surfaces. *Langmuir* **1999**, *15*, 7600–7604.
- (4) Hozumi, A.; Yokogawa, Y.; Kameyama, T.; Sugimura, H.; Hayashi, K.; Shirayama, K.; Takai, O. Amino-Terminated Self-Assembled Monolayer on a SiO<sub>2</sub> Surface Formed by Chemical Vapor Deposition. *J. Vac. Sci. Technol. A* **2001**, *19*, 1812–1816.
- (5) Howarter, J. A.; Youngblood, J. Optimization of Silica Silanization by 3-Aminopropyltriethoxysilane. *Langmuir* **2006**, *22*, 11142-11147.
